# Supplementary material for: Exosomal miRNAs from Prostate Cancer Impair Osteoblast Function in Mice
Source: MDPI journal article supplement (doi:10.3390/ijms23031285), 2022-01-24
Supplement: s1 [file s1]

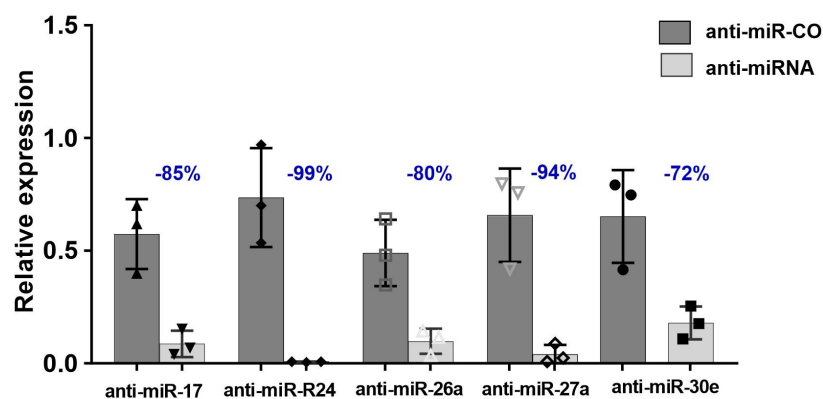

**Supplementary Figure S1. Knockdown efficiency of anti-miRNA targeting EV-derived miRNAs from RM1-BM.** RM1-BM were transfected with non-targeting anti-miR-control or targeting miRNA inhibitors for miR-17-5p, miR-24-3p, miR-26a-5p, miR-27a-3p, miR-30e-5p. After 48 h, mRNA was isolated, and qPCR analyses were performed. Data are presented as mean  $\pm$  SD (n=3). The percentage of knockdown was calculated for the cells treated with targeting vs. non-targeting anti-miR CO for each exosomal miRNAs.
