# Supplementary material for: Exosomal miRNAs from Prostate Cancer Impair Osteoblast Function in Mice
Source: MDPI journal article supplement (doi:10.3390/ijms23031285), 2022-01-24
Supplement: s1 [file s1]

**Suppl. Table S5. Summary of the results obtained from gene ontology analysis.**

**(a) Up-regulated genes in RM1-BM EVs-treated osteoprogenitors.**

| GO | Function                                                  | Size | p-value  | Genes                                                                                                                                                 |
|----|-----------------------------------------------------------|------|----------|-------------------------------------------------------------------------------------------------------------------------------------------------------|
| BP | Cell-cell adhesion via plasma-membrane adhesion molecules | 7    | 8.8 E-6  | [Bmp2. Cdh11. Cdh2. Fat4. Igsf9b. Pcdh20. Scarf2]                                                                                                     |
| BP | Response to cytokine                                      | 23   | 2.4 E-17 | [Acp5. Ccl5. Ccr1. Ccr5. Cxcl10. Cxcl3. Gbp2. Gbp3. Gbp5. Gbp7. Gm4951. Ifi203. Ifi205. Ifit1. Igtp. Il21r. Il6. Irgm2. Mx2. Nlrc5. Parp9. Pf4. Saa3] |
| BP | Cellular response to cytokine stimulus                    | 19   | 3.4 E-14 | [Ccl5. Ccr1. Ccr5. Cxcl10. Cxcl3. Gbp2. Gbp3. Gbp5. Gbp7. Gm4951. Ifi203. Ifi205. Ifit1. Igtp. Il21r. Il6. Nlrc5. Pf4. Saa3]                          |
| BP | Cellular response to interferon-beta                      | 7    | 1.6 E-10 | [Gbp2. Gbp3. Gm4951. Ifi203. Ifi205. Ifit1. Igtp]                                                                                                     |
| BP | Defense response to protozoan                             | 5    | 1.2 E-6  | [Gbp2. Gbp3. Gbp7. Il6. Irgm2]                                                                                                                        |
| BP | Sister chromatid segregation                              | 7    | 6.7 E-6  | [Bub1. Cenpe. Kif18b. Kif2c. Ncapg. Plk1. Top2a]                                                                                                      |
| BP | Regulation of viral genome replication                    | 5    | 9.9 E-5  | [Ccl5. Mx2. Oas1b. Parp10. Top2a]                                                                                                                     |
| BP | Positive regulation of cell killing                       | 4    | 7.2 E-4  | [B2m. Ccr5. H2-K1. Pnp]                                                                                                                               |
| BP | Mitotic cell cycle checkpoint                             | 5    | 7.3 E-4  | [Bub1. Cenpe. Kntc1. Plk1. Top2a]                                                                                                                     |
| BP | Chromosome separation                                     | 4    | 1.3 E-3  | [Bub1. Cenpe. Plk1. Top2a]                                                                                                                            |
| BP | Regulation of chromosome segregation                      | 4    | 1.6 E-3  | [Bub1. Cenpe. Kif2c. Plk1]                                                                                                                            |
| BP | Spindle assembly checkpoint                               | 3    | 1.6 E-3  | [Bub1. Cenpe. Plk1]                                                                                                                                   |

|     |                                                                 |   |         |                                                     |
|-----|-----------------------------------------------------------------|---|---------|-----------------------------------------------------|
| BP  | Mitotic spindle checkpoint                                      | 3 | 1.8 E-3 | [Bub1. Cenpe. Plk1]                                 |
| BP  | Reactive nitrogen species metabolic process                     | 4 | 1.9 E-3 | [Acp5. Clu. Il6. Prdx5]                             |
| BP  | Negative regulation of protein ubiquitination                   | 4 | 2.0 E-3 | [Cenpe. Gbp3. Parp10. Plk1]                         |
| BP  | Positive regulation of acute inflammatory response              | 3 | 2.6 E-3 | [Ccl5. Ccr5. Il6]                                   |
| BP  | Regulation of response to cytokine stimulus                     | 3 | 2.7 E-3 | [Ccl5. Nlrc5. Parp9]                                |
| BP  | Regulation of tumor necrosis factor production                  | 4 | 4.5 E-3 | [Acp5. Ccr5. Clu. Pf4]                              |
| BP  | Positive regulation of tyrosine phosphorylation of STAT protein | 3 | 4.6 E-3 | [Ccl5. Il6. Pecam1]                                 |
| CC  | Symbiont-containing vacuole                                     | 4 | 7.1 E-7 | [Gbp2. Gbp3. Gbp7. Irgm2]                           |
| CC  | MHC class I protein complex                                     | 4 | 8.9 E-6 | [B2m. H2-K1. H2-Q4. H2-Q6]                          |
| CC  | Condensed nuclear chromosome kinetochore                        | 3 | 7.3 E-5 | [Bub1. Cenpe. Plk1]                                 |
| CC  | Kinetochore                                                     | 6 | 1.0 E-4 | [Bub1. Cenpe. Kif2c. Kntc1. Nuf2. Plk1]             |
| CC  | Condensed chromosome outer kinetochore                          | 3 | 2.8 E-4 | [Bub1. Cenpe. Plk1]                                 |
| CC  | Golgi medial cisterna                                           | 3 | 6.4 E-4 | [H2-K1. H2-Q4. H2-Q6]                               |
| ISP | Response to interferon-gamma                                    | 8 | 1.6 E-9 | [Ccl5. Gbp2. Gbp3. Gbp5. Gbp7. Irgm2. Nlrc5. Parp9] |
| ISP | Positive regulation of leukocyte migration                      | 7 | 3.9 E-6 | [Ccl5. Ccr1. Cxcl10. Cxcl3. Mmp9. Pecam1. Pf4]      |
| ISP | Cellular response to interferon-gamma                           | 5 | 1.1 E-5 | [Gbp2. Gbp3. Gbp5. Gbp7. Nlrc5]                     |

|      |                                                     |   |         |                                          |
|------|-----------------------------------------------------|---|---------|------------------------------------------|
| ISP  | Positive regulation of leukocyte chemotaxis         | 5 | 1.5 E-4 | [Ccl5. Ccr1. Cxcl10. Cxcl3. Pf4]         |
| ISP  | Positive regulation of monocyte chemotaxis          | 3 | 2.8 E-4 | [Ccl5. Ccr1. Cxcl10]                     |
| ISP  | Positive regulation of T cell mediated cytotoxicity | 3 | 9.0 E-4 | [B2m. H2-K1. Pnp]                        |
| MF   | Chemokine activity                                  | 4 | 2.8 E-4 | [Ccl5. Cxcl10. Cxcl3. Pf4]               |
| KEGG | TNF signaling pathway                               | 6 | 8.8 E-5 | [Ccl5. Cxcl10. Cxcl3. Gm5431. Il6. Mmp9] |

BP = biological processes; CC= cellular components; MF= molecular functions; ISP= immune system process; KEGG= Kyoto Encyclopedia of Genes and Genomes; up-regulated genes cutoff: +0.6 (p-value).

**(b) Down-regulated genes in RM1-BM EVs-treated osteoprogenitors.**

| GO | Function                                                        | Size | p-value | Genes                                            |
|----|-----------------------------------------------------------------|------|---------|--------------------------------------------------|
| BP | Cell-cell adhesion via plasma-membrane adhesion molecules       | 7    | 8.8 E-6 | [Bmp2. Cdh11. Cdh2. Fat4. Igfbp. Pcdh20. Scarf2] |
| BP | Homophilic cell adhesion via plasma membrane adhesion molecules | 5    | 2.1 E-4 | [Cdh11. Cdh2. Fat4. Igfbp. Pcdh20]               |
| BP | Ureteric bud development                                        | 5    | 2.7 E-4 | [Bmp2. Cat. Fat4. Fgfr1. Npnt]                   |
| BP | Establishment of nucleus localization                           | 3    | 2.7 E-4 | [Cdc42bpa. Myh10. Slit3]                         |
| BP | Bone mineralization                                             | 5    | 4.1 E-4 | [Ank. Bmp2. Ddr2. Dnm3os. Klf10]                 |

|      |                                                                                  |   |         |                                |
|------|----------------------------------------------------------------------------------|---|---------|--------------------------------|
| BP   | Regulation of steroid hormone biosynthetic process                               | 3 | 6.9 E-4 | [Bmp2. Dkk3. Igf1r]            |
| BP   | Regulation of osteoblast differentiation                                         | 5 | 9.7 E-4 | [Bmp2. Ddr2. Fgfr1. Id3. Npnt] |
| BP   | Positive regulation of phosphatase activity                                      | 3 | 1.0 E-3 | [Bmp2. Itga1. Npnt]            |
| BP   | Positive regulation of cyclin-dependent protein serine/threonine kinase activity | 3 | 1.0 E-3 | [Ccnd1. Ccnd2. Pkd1]           |
| BP   | Heterophilic cell-cell adhesion via plasma membrane cell adhesion molecules      | 3 | 2.4 E-3 | [Cdh2. Fat4. Scarf2]           |
| BP   | Developmental induction                                                          | 3 | 2.8 E-3 | [Bmp2. Fgfr1. Fzd5]            |
| BP   | Inner ear receptor cell differentiation                                          | 3 | 5.0 E-3 | [Fat4. Fgfr1. Myo6]            |
| BP   | Branching involved in ureteric bud morphogenesis                                 | 3 | 6.5 E-3 | [Bmp2. Fat4. Npnt]             |
| BP   | Regulation of bone mineralization                                                | 3 | 7.7 E-3 | [Ank. Bmp2. Ddr2]              |
| BP   | Positive regulation of osteoblast differentiation                                | 3 | 8.4 E-3 | [Bmp2. Ddr2. Npnt]             |
| CC   | Cell-cell contact zone                                                           | 4 | 9.7 E-4 | [Ahnak. Cdh2. Dst. Kcnj2]      |
| MF   | Transmembrane receptor protein tyrosine kinase activity                          | 4 | 1.0 E-3 | [Ddr2. Eph3. Fgfr1. Igf1r]     |
| KEGG | ECM-receptor interaction.                                                        | 4 | 2.3 E-3 | [Hspg2. Itga1. Npnt. Thbs2]    |
| KEGG | Adherens junction                                                                | 3 | 2.4 E-3 | [Fgfr1. Igf1r. Lmo7]           |
| KEGG | Melanoma                                                                         | 3 | 4.3 E-3 | [Ccnd1. Fgfr1. Igf1r]          |

BP = biological processes; CC= cellular components; MF= molecular functions; KEGG= Kyoto Encyclopedia of Genes and Genomes.
