# Supplementary material for: Exosomal miRNAs from Prostate Cancer Impair Osteoblast Function in Mice
Source: MDPI journal article supplement (doi:10.3390/ijms23031285), 2022-01-24
Supplement: s1 [file s1]

**Suppl. Table S4. GSEA of whole expression patterns of transcriptomic and proteomic analyses.**

|                                    | <i>Transcriptomics</i> |            |                |                    | <i>Proteomics</i> |            |                |                    |
|------------------------------------|------------------------|------------|----------------|--------------------|-------------------|------------|----------------|--------------------|
| <b>HALLMARK</b>                    | <b>SIZE</b>            | <b>NES</b> | <b>p-value</b> | <b>FDR q-value</b> | <b>SIZE</b>       | <b>NES</b> | <b>p-value</b> | <b>FDR q-value</b> |
| UV_RESPONSE_DN                     | 140                    | -2.43      | 0.001          | 0.001              | 33                | -2.06      | 0.001          | 0.001              |
| TGF_BETA_SIGNALING                 | 54                     | -2.11      | 0.001          | 0.001              | 13                | -1.24      | 0.232          | 0.390              |
| EPITHELIAL_MESENCHYMAL_TRANSITION  | 184                    | -1.71      | 0.002          | 0.006              | 80                | -2.04      | 0.001          | 0.001              |
| ESTROGEN_RESPONSE_EARLY            | 174                    | -1.69      | 0.001          | 0.0062             | 28                | -1.17      | 0.245          | 0.437              |
| WNT_BETA_CATENIN_SIGNALING         | 39                     | -1.54      | 0.021          | 0.02               | 8                 | -0.75      | 0.765          | 0.984              |
| NOTCH_SIGNALING                    | 32                     | -1.54      | 0.002          | 0.017              | 5                 | -1.2       | 0.262          | 0.427              |
| MYOGENESIS                         | 171                    | -1.53      | 0.001          | 0.0167             | 57                | -1.88      | 0.001          | 0.003              |
| OSTEOBLAST_TRANSCRIPTION_FACTORS** | 14                     | -1.96      | 0.002          | 0.001              |                   |            |                |                    |
| OSTEOBLAST_DIFFERENTIATION*        | 12                     | -1.47      | 0.059          | 0.029              |                   |            |                |                    |
| APICAL_JUNCTION                    |                        |            |                |                    | 67                | -1.89      | 0.001          | 0.004              |
| HYPOXIA                            |                        |            |                |                    | 63                | -1.66      | 0.001          | 0.049              |
| KRAS_SIGNALING_DN                  |                        |            |                |                    | 13                | -1.66      | 0.020          | 0.041              |
| INTERFERON_ALPHA_RESPONSE          | 89                     | 3.4        | 0.001          | 0.001              | 30                | 1.42       | 0.086          | 0.194              |
| INTERFERON_GAMMA_RESPONSE          | 185                    | 3.28       | 0.001          | 0.001              | 61                | 1.46       | 0.041          | 0.174              |
| E2F_TARGETS                        | 194                    | 3.15       | 0.001          | 0.001              | 80                | 2.24       | 0.001          | 0.001              |
| G2M_CHECKPOINT                     | 190                    | 2.81       | 0.001          | 0.001              | 72                | 1.98       | 0.001          | 0.002              |

|                           |     |      |       |       |     |      |       |       |
|---------------------------|-----|------|-------|-------|-----|------|-------|-------|
| OXIDATIVE_PHOSPHORYLATION | 179 | 2.78 | 0.001 | 0.001 |     |      |       |       |
| MYC_TARGETS_V1            | 183 | 2.49 | 0.001 | 0.001 | 172 | 1.54 | 0.001 | 0.120 |
| ALLOGRAFT_REJECTION       | 157 | 2.47 | 0.001 | 0.001 | 59  | 1.18 | 0.205 | 0.307 |
| INFLAMMATORY_RESPONSE     | 177 | 2.33 | 0.001 | 0.001 | 31  | 1.24 | 0.190 | 0.288 |
| MTORC1_SIGNALING          | 193 | 2.21 | 0.001 | 0.001 |     |      |       |       |
| IL6_JAK_STAT3_SIGNALING   | 78  | 2.11 | 0.001 | 0.001 | 17  | 1.7  | 0.017 | 0.054 |
| DNA_REPAIR                | 138 | 1.9  | 0.001 | 0.001 | 58  | 1.32 | 0.108 | 0.278 |
| COMPLEMENT                | 164 | 1.84 | 0.001 | 0.001 | 70  | 1.31 | 0.092 | 0.258 |
| TNFA_SIGNALING_VIA_NFKB   | 193 | 1.8  | 0.001 | 0.001 |     |      |       |       |
| COAGULATION               | 100 | 1.75 | 0.001 | 0.003 | 38  | 1.26 | 0.157 | 0.302 |
| MYC_TARGETS_V2            | 56  | 1.7  | 0.002 | 0.004 | 28  | 1.66 | 0.026 | 0.061 |
| ADIPOGENESIS              | 184 | 1.63 | 0.001 | 0.008 |     |      |       |       |
| GLYCOLYSIS                | 183 | 1.55 | 0.001 | 0.017 |     |      |       |       |
| UNFOLDED_PROTEIN_RESPONSE | 101 | 1.53 | 0.002 | 0.019 | 62  | 1.18 | 0.203 | 0.326 |
| IL2_STAT5_SIGNALING       | 184 | 1.47 | 0.007 | 0.031 |     |      |       |       |
| ANGIOGENESIS              | 31  | 1.44 | 0.061 | 0.037 | 14  | 0.91 | 0.573 | 0.771 |
| KRAS_SIGNALING_UP         | 172 | 1.44 | 0.002 | 0.037 | 61  | 0.89 | 0.592 | 0.990 |

*P* value: corrected with Bonferroni post hoc test. NES: Normalized enrichment score; FDR: false discovery rate.
