# Supplementary material for: Exosomal miRNAs from Prostate Cancer Impair Osteoblast Function in Mice
Source: MDPI journal article supplement (doi:10.3390/ijms23031285), 2022-01-24
Supplement: s1 [file s1]

**Suppl. Table S6. List of all identified miRNAs in RM1-BM-EVs.**

Read counts are normalized to 1 million mapped miRNAs.

| Exosomal miRNAs | Reads per millions (RPM) |          |          |          |
|-----------------|--------------------------|----------|----------|----------|
|                 | n1                       | n2       | n3       | mean     |
| mmu-miR-21a-5p  | 230207.6                 | 166507.5 | 148812.4 | 181842.5 |
| mmu-let-7f-5p   | 101928                   | 97335.78 | 103267.2 | 100843.6 |
| mmu-miR-182-5p  | 70896.17                 | 84865.52 | 98526.78 | 84762.82 |
| mmu-miR-92a-3p  | 41346.73                 | 52860.36 | 67280.24 | 53829.11 |
| mmu-let-7a-5p   | 37317.44                 | 41380.9  | 41770.43 | 40156.26 |
| mmu-let-7i-5p   | 36712.52                 | 37093.96 | 37042.37 | 36949.62 |
| mmu-miR-183-5p  | 26867.9                  | 32969.46 | 42946.59 | 34261.32 |
| mmu-let-7c-5p   | 24781.44                 | 29459.03 | 29968.15 | 28069.54 |
| mmu-miR-30d-5p  | 19939.57                 | 21907.06 | 20478.79 | 20775.14 |
| mmu-miR-143-3p  | 25062.15                 | 20306.8  | 16625.16 | 20664.7  |
| mmu-miR-23a-3p  | 16772.95                 | 20152.42 | 20080.99 | 19002.12 |
| mmu-let-7g-5p   | 17901.54                 | 18038.33 | 16020.45 | 17320.11 |
| mmu-miR-26a-5p  | 15355.43                 | 17138.55 | 17611.66 | 16701.88 |
| mmu-miR-10b-5p  | 13087.58                 | 15976.08 | 20014.48 | 16359.38 |
| mmu-miR-30a-5p  | 16489.77                 | 15190.35 | 14354.12 | 15344.75 |
| mmu-miR-26b-5p  | 12894.69                 | 12458.74 | 12793.7  | 12715.71 |
| mmu-miR-99b-5p  | 8834.22                  | 11855.04 | 14086.87 | 11592.04 |
| mmu-miR-140-3p  | 9526.15                  | 11921.87 | 12849.12 | 11432.38 |
| mmu-miR-24-3p   | 11500.16                 | 11860.8  | 8777.5   | 10712.82 |
| mmu-miR-16-5p   | 10299.34                 | 10890.74 | 8379.7   | 9856.593 |
| mmu-miR-199a-3p | 9555.7                   | 9290.48  | 8340.29  | 9062.157 |
| mmu-miR-199b-3p | 9534.35                  | 9253.62  | 8304.58  | 9030.85  |
| mmu-miR-98-5p   | 8105.35                  | 8416.04  | 10167.96 | 8896.45  |
| mmu-let-7d-5p   | 7653.91                  | 9519.75  | 8528.72  | 8567.46  |
| mmu-miR-221-3p  | 7864.86                  | 8956.38  | 8687.6   | 8502.947 |

|                 |         |         |         |          |
|-----------------|---------|---------|---------|----------|
| mmu-miR-222-3p  | 7430.66 | 9035.87 | 9020.13 | 8495.553 |
| mmu-miR-29a-3p  | 7172.93 | 9011.68 | 9132.2  | 8438.937 |
| mmu-miR-93-5p   | 8566.64 | 9634.96 | 6802.04 | 8334.547 |
| mmu-miR-30c-5p  | 7709.73 | 9537.03 | 7648.14 | 8298.3   |
| mmu-let-7e-5p   | 7030.93 | 8763.98 | 8642.03 | 8145.647 |
| mmu-miR-27b-3p  | 6975.12 | 6880.3  | 7181.37 | 7012.263 |
| mmu-miR-25-3p   | 6316.84 | 6907.95 | 7619.81 | 6948.2   |
| mmu-miR-27a-3p  | 6314.38 | 5904.48 | 6130.83 | 6116.563 |
| mmu-miR-103-3p  | 6100.97 | 6478.22 | 5386.95 | 5988.713 |
| mmu-miR-155-5p  | 5005.21 | 5742.03 | 5113.54 | 5286.927 |
| mmu-miR-7a-5p   | 6388.25 | 4413.67 | 3219.36 | 4673.76  |
| mmu-miR-151-3p  | 3703.43 | 4763.91 | 5139.4  | 4535.58  |
| mmu-miR-22-3p   | 4896.86 | 5323.82 | 3332.67 | 4517.783 |
| mmu-let-7b-5p   | 4007.12 | 4753.54 | 4668.94 | 4476.533 |
| mmu-miR-23b-3p  | 3325.04 | 4367.59 | 4724.36 | 4138.997 |
| mmu-miR-31-5p   | 4103.15 | 4428.65 | 3533.42 | 4021.74  |
| mmu-miR-196b-5p | 3329.97 | 3614.12 | 4010.04 | 3651.377 |
| mmu-miR-191-5p  | 3048.43 | 3763.89 | 3661.5  | 3491.273 |
| mmu-miR-15b-5p  | 2913    | 4144.08 | 3353.61 | 3470.23  |
| mmu-miR-20a-5p  | 4424.09 | 3677.48 | 2182.37 | 3427.98  |
| mmu-miR-125b-5p | 2847.34 | 3221.25 | 3123.3  | 3063.963 |
| mmu-miR-17-5p   | 3258.56 | 3361.81 | 2110.94 | 2910.437 |
| mmu-miR-652-3p  | 2805.48 | 2843.37 | 2830.18 | 2826.343 |
| mmu-miR-30e-5p  | 3808.49 | 2572.63 | 1597.37 | 2659.497 |
| mmu-miR-374b-5p | 2530.51 | 2949.36 | 2158.97 | 2546.28  |
| mmu-miR-186-5p  | 2830.92 | 2690.14 | 1933.59 | 2484.883 |
| mmu-miR-34c-5p  | 2731.61 | 2525.39 | 2076.45 | 2444.483 |
| mmu-miR-320-3p  | 2010.13 | 2626.77 | 2464.4  | 2367.1   |
| mmu-miR-151-5p  | 2147.2  | 2703.96 | 2213.16 | 2354.773 |
| mmu-let-7j      | 2281.81 | 2443.59 | 2134.34 | 2286.58  |
| mmu-miR-30b-5p  | 2200.55 | 2103.72 | 1636.78 | 1980.35  |

|                 |         |         |         |          |
|-----------------|---------|---------|---------|----------|
| mmu-miR-199a-5p | 1926.41 | 2178.61 | 1578.89 | 1894.637 |
| mmu-miR-214-3p  | 1538.99 | 2118.7  | 1899.1  | 1852.263 |
| mmu-miR-100-5p  | 1393.71 | 1771.92 | 2299.37 | 1821.667 |
| mmu-miR-378a-3p | 1737.62 | 2017.32 | 1642.93 | 1799.29  |
| mmu-miR-125a-5p | 1422.44 | 1748.88 | 1869.55 | 1680.29  |
| mmu-miR-423-3p  | 1481.53 | 1593.35 | 1658.94 | 1577.94  |
| mmu-miR-196a-5p | 1423.26 | 1414.77 | 1860.92 | 1566.317 |
| mmu-miR-467a-5p | 1681.81 | 1472.38 | 1128.13 | 1427.44  |
| mmu-miR-467b-5p | 1681.81 | 1472.38 | 1128.13 | 1427.44  |
| mmu-miR-361-5p  | 1374.83 | 1533.44 | 1307.94 | 1405.403 |
| mmu-miR-34b-3p  | 1144.19 | 1438.96 | 1589.98 | 1391.043 |
| mmu-miR-425-5p  | 1237.76 | 1535.74 | 1291.93 | 1355.143 |
| mmu-miR-132-3p  | 1145.83 | 1366.38 | 1464.35 | 1325.52  |
| mmu-miR-101b-3p | 1716.28 | 958.54  | 703.23  | 1126.017 |
| mmu-miR-148b-3p | 1108.89 | 1111.77 | 955.71  | 1058.79  |
| mmu-miR-145a-5p | 913.54  | 1255.78 | 1001.28 | 1056.867 |
| mmu-miR-669c-5p | 975.93  | 997.71  | 1087.49 | 1020.377 |
| mmu-miR-423-5p  | 955.41  | 942.41  | 964.33  | 954.05   |
| mmu-miR-106b-5p | 1451.17 | 792.64  | 587.47  | 943.76   |
| mmu-miR-24-2-5p | 964.43  | 960.85  | 833.78  | 919.6867 |
| mmu-miR-532-5p  | 766.62  | 821.44  | 1125.67 | 904.5767 |
| mmu-miR-30a-3p  | 752.67  | 937.8   | 975.42  | 888.63   |
| mmu-miR-351-5p  | 791.25  | 884.81  | 977.88  | 884.6467 |
| mmu-miR-96-5p   | 957.05  | 615.22  | 883.05  | 818.44   |
| mmu-miR-466e-3p | 880.71  | 797.25  | 692.15  | 790.0367 |
| mmu-miR-466b-3p | 879.89  | 796.1   | 692.15  | 789.38   |
| mmu-miR-466c-3p | 879.89  | 796.1   | 692.15  | 789.38   |
| mmu-miR-466p-3p | 879.89  | 796.1   | 692.15  | 789.38   |
| mmu-miR-146b-5p | 774.01  | 760.38  | 697.08  | 743.8233 |
| mmu-miR-466a-3p | 816.69  | 740.8   | 641.66  | 733.05   |
| mmu-miR-322-3p  | 776.47  | 806.47  | 598.55  | 727.1633 |

|                 |        |        |        |          |
|-----------------|--------|--------|--------|----------|
| mmu-miR-99a-5p  | 531.88 | 744.25 | 900.29 | 725.4733 |
| mmu-miR-106b-3p | 517.92 | 782.27 | 734.02 | 678.07   |
| mmu-miR-467e-5p | 828.18 | 629.04 | 559.14 | 672.12   |
| mmu-miR-669a-5p | 708.35 | 723.51 | 549.29 | 660.3833 |
| mmu-miR-669p-5p | 708.35 | 723.51 | 549.29 | 660.3833 |
| mmu-miR-674-3p  | 653.35 | 723.51 | 576.38 | 651.08   |
| mmu-miR-34c-3p  | 467.03 | 700.47 | 699.54 | 622.3467 |
| mmu-miR-467a-3p | 573.74 | 571.44 | 679.83 | 608.3367 |
| mmu-miR-467d-3p | 573.74 | 571.44 | 679.83 | 608.3367 |
| mmu-miR-342-3p  | 454.72 | 629.04 | 650.28 | 578.0133 |
| mmu-miR-28a-3p  | 485.09 | 620.98 | 604.71 | 570.26   |
| mmu-miR-30e-3p  | 529.41 | 596.78 | 525.89 | 550.6933 |
| mmu-miR-1839-5p | 514.64 | 527.66 | 556.68 | 532.9933 |
| mmu-miR-466d-3p | 612.31 | 483.88 | 501.25 | 532.48   |
| mmu-miR-872-5p  | 573.74 | 468.9  | 516.03 | 519.5567 |
| mmu-miR-128-3p  | 494.12 | 563.37 | 447.07 | 501.52   |
| mmu-miR-149-5p  | 375.1  | 556.46 | 534.51 | 488.69   |
| mmu-miR-467c-5p | 481.81 | 540.33 | 439.68 | 487.2733 |
| mmu-miR-107-3p  | 457.18 | 595.63 | 407.65 | 486.82   |
| mmu-miR-484     | 538.44 | 435.49 | 472.93 | 482.2867 |
| mmu-miR-34a-5p  | 573.74 | 368.67 | 400.27 | 447.56   |
| mmu-miR-142a-5p | 460.47 | 433.19 | 434.75 | 442.8033 |
| mmu-miR-28a-5p  | 363.61 | 468.9  | 415.04 | 415.85   |
| mmu-miR-362-5p  | 346.38 | 422.82 | 460.61 | 409.9367 |
| mmu-miR-3535    | 324.21 | 377.89 | 400.27 | 367.4567 |
| mmu-miR-365-3p  | 314.36 | 450.47 | 337.45 | 367.4267 |
| mmu-miR-129-5p  | 312.72 | 353.69 | 411.35 | 359.2533 |
| mmu-miR-501-3p  | 361.97 | 374.43 | 341.15 | 359.1833 |
| mmu-miR-421-3p  | 302.87 | 384.8  | 381.79 | 356.4867 |
| mmu-miR-101a-3p | 600.82 | 207.38 | 254.94 | 354.38   |
| mmu-miR-450a-5p | 439.95 | 308.76 | 301.74 | 350.15   |

|                   |        |        |        |          |
|-------------------|--------|--------|--------|----------|
| mmu-miR-99b-3p    | 299.59 | 396.32 | 338.69 | 344.8667 |
| mmu-miR-18a-5p    | 503.15 | 290.33 | 190.9  | 328.1267 |
| mmu-miR-126a-3p   | 358.69 | 291.48 | 285.73 | 311.9667 |
| mmu-miR-1983      | 282.35 | 330.65 | 320.21 | 311.07   |
| mmu-miR-130a-3p   | 263.48 | 329.5  | 285.73 | 292.9033 |
| mmu-miR-19b-3p    | 548.29 | 263.83 | 60.35  | 290.8233 |
| mmu-miR-221-5p    | 256.09 | 296.09 | 314.05 | 288.7433 |
| mmu-miR-674-5p    | 265.12 | 322.59 | 261.1  | 282.9367 |
| mmu-miR-669a-3p   | 414.5  | 191.25 | 238.93 | 281.56   |
| mmu-miR-669o-3p   | 414.5  | 191.25 | 238.93 | 281.56   |
| mmu-miR-467d-5p   | 274.97 | 322.59 | 232.77 | 276.7767 |
| mmu-miR-298-5p    | 239.67 | 351.39 | 232.77 | 274.61   |
| mmu-miR-744-5p    | 275.79 | 300.7  | 229.07 | 268.52   |
| mmu-miR-6240      | 219.97 | 321.43 | 256.17 | 265.8567 |
| mmu-miR-140-5p    | 283.17 | 254.61 | 240.16 | 259.3133 |
| mmu-miR-9-5p      | 285.64 | 214.29 | 274.64 | 258.19   |
| mmu-miR-324-5p    | 252.8  | 262.68 | 253.71 | 256.3967 |
| mmu-miR-361-3p    | 209.3  | 256.92 | 274.64 | 246.9533 |
| mmu-miR-322-5p    | 264.3  | 254.61 | 221.69 | 246.8667 |
| mmu-let-7a-1-3p   | 283.17 | 194.7  | 259.86 | 245.91   |
| mmu-let-7c-2-3p   | 283.17 | 194.7  | 259.86 | 245.91   |
| mmu-miR-212-3p    | 228.18 | 307.61 | 195.82 | 243.87   |
| mmu-miR-345-3p    | 206.02 | 240.79 | 209.37 | 218.7267 |
| mmu-miR-503-5p    | 247.88 | 197.01 | 169.96 | 204.95   |
| mmu-miR-185-5p    | 175.65 | 231.57 | 206.91 | 204.71   |
| mmu-miR-350-3p    | 174.01 | 214.29 | 192.13 | 193.4767 |
| mmu-miR-1198-5p   | 164.98 | 163.6  | 250.01 | 192.8633 |
| mmu-let-7d-3p     | 174.83 | 190.1  | 213.06 | 192.6633 |
| mmu-miR-450b-3p   | 172.37 | 206.22 | 198.29 | 192.2933 |
| mmu-miR-125b-1-3p | 156.77 | 209.68 | 198.29 | 188.2467 |
| mmu-miR-378c      | 179.75 | 199.31 | 179.81 | 186.29   |

|                  |        |        |        |          |
|------------------|--------|--------|--------|----------|
| mmu-miR-206-3p   | 176.47 | 175.12 | 205.67 | 185.7533 |
| mmu-miR-15a-5p   | 259.37 | 183.18 | 113.31 | 185.2867 |
| mmu-miR-15b-3p   | 161.7  | 184.33 | 199.52 | 181.85   |
| mmu-miR-194-5p   | 220.79 | 210.83 | 98.53  | 176.7167 |
| mmu-miR-218-5p   | 195.35 | 167.05 | 167.5  | 176.6333 |
| mmu-miR-671-5p   | 174.83 | 246.55 | 105.92 | 175.7667 |
| mmu-miR-542-3p   | 286.46 | 149.77 | 78.82  | 171.6833 |
| mmu-miR-212-5p   | 124.76 | 156.68 | 224.15 | 168.53   |
| mmu-miR-5099     | 193.71 | 188.94 | 117    | 166.55   |
| mmu-miR-192-5p   | 175.65 | 162.45 | 160.11 | 166.07   |
| mmu-miR-22-5p    | 165.8  | 175.12 | 129.32 | 156.7467 |
| mmu-miR-152-3p   | 176.47 | 153.23 | 140.4  | 156.7    |
| mmu-miR-129-2-3p | 116.55 | 148.62 | 192.13 | 152.4333 |
| mmu-miR-130b-3p  | 119.84 | 158.99 | 167.5  | 148.7767 |
| mmu-miR-574-5p   | 124.76 | 129.03 | 188.43 | 147.4067 |
| mmu-miR-199b-5p  | 183.86 | 137.1  | 120.7  | 147.22   |
| mmu-miR-326-3p   | 116.55 | 120.97 | 185.97 | 141.1633 |
| mmu-miR-486b-5p  | 85.36  | 129.03 | 197.05 | 137.1467 |
| mmu-miR-574-3p   | 121.48 | 135.95 | 152.72 | 136.7167 |
| mmu-miR-486a-5p  | 84.54  | 124.43 | 197.05 | 135.34   |
| mmu-miR-183-3p   | 137.07 | 142.86 | 121.93 | 133.9533 |
| mmu-miR-324-3p   | 96.85  | 162.45 | 129.32 | 129.54   |
| mmu-miR-181a-5p  | 89.47  | 137.1  | 142.86 | 123.1433 |
| mmu-miR-130b-5p  | 109.17 | 139.4  | 119.46 | 122.6767 |
| mmu-miR-210-3p   | 92.75  | 153.23 | 118.23 | 121.4033 |
| mmu-miR-328-3p   | 91.93  | 101.38 | 149.02 | 114.11   |
| mmu-miR-339-5p   | 102.6  | 111.75 | 118.23 | 110.86   |
| mmu-miR-98-3p    | 119.02 | 97.93  | 107.15 | 108.0333 |
| mmu-miR-466f-3p  | 110.81 | 105.99 | 99.76  | 105.52   |
| mmu-miR-214-5p   | 105.06 | 115.21 | 87.44  | 102.57   |
| mmu-miR-145a-3p  | 97.67  | 88.71  | 117    | 101.1267 |

|                  |        |        |        |          |
|------------------|--------|--------|--------|----------|
| mmu-miR-190b-5p  | 130.51 | 103.69 | 68.97  | 101.0567 |
| mmu-miR-5121     | 67.31  | 134.79 | 99.76  | 100.62   |
| mmu-miR-297a-3p  | 100.14 | 103.69 | 97.3   | 100.3767 |
| mmu-miR-297b-3p  | 100.14 | 103.69 | 97.3   | 100.3767 |
| mmu-miR-297c-3p  | 100.14 | 103.69 | 97.3   | 100.3767 |
| mmu-miR-17-3p    | 88.65  | 100.23 | 112.07 | 100.3167 |
| mmu-miR-669l-5p  | 105.06 | 105.99 | 88.67  | 99.90667 |
| mmu-miR-1981-5p  | 75.51  | 101.38 | 114.54 | 97.14333 |
| mmu-miR-132-5p   | 91.11  | 80.65  | 108.38 | 93.38    |
| mmu-miR-664-3p   | 91.93  | 101.38 | 80.05  | 91.12    |
| mmu-miR-672-5p   | 61.56  | 112.91 | 89.91  | 88.12667 |
| mmu-miR-669o-5p  | 96.03  | 57.6   | 100.99 | 84.87333 |
| mmu-miR-125a-3p  | 85.36  | 80.65  | 86.21  | 84.07333 |
| mmu-let-7i-3p    | 76.33  | 117.51 | 57.88  | 83.90667 |
| mmu-miR-872-3p   | 104.24 | 73.73  | 59.12  | 79.03    |
| mmu-miR-690      | 63.2   | 80.65  | 89.91  | 77.92    |
| mmu-miR-181b-5p  | 69.77  | 81.8   | 73.9   | 75.15667 |
| mmu-miR-18b-5p   | 112.45 | 65.67  | 35.72  | 71.28    |
| mmu-miR-29c-3p   | 78.8   | 65.67  | 67.74  | 70.73667 |
| mmu-miR-708-5p   | 87.83  | 63.37  | 57.88  | 69.69333 |
| mmu-miR-466g     | 80.44  | 62.21  | 65.27  | 69.30667 |
| mmu-miR-671-3p   | 68.95  | 70.28  | 66.51  | 68.58    |
| mmu-miR-345-5p   | 60.74  | 78.34  | 64.04  | 67.70667 |
| mmu-miR-10a-5p   | 62.38  | 71.43  | 68.97  | 67.59333 |
| mmu-miR-193b-3p  | 41.86  | 65.67  | 93.6   | 67.04333 |
| mmu-miR-30c-2-3p | 62.38  | 66.82  | 71.43  | 66.87667 |
| mmu-miR-18a-3p   | 64.02  | 73.73  | 61.58  | 66.44333 |
| mmu-miR-31-3p    | 59.1   | 76.04  | 61.58  | 65.57333 |
| mmu-miR-582-3p   | 47.61  | 85.25  | 61.58  | 64.81333 |
| mmu-miR-331-3p   | 53.35  | 59.91  | 80.05  | 64.43667 |
| mmu-miR-29b-3p   | 73.05  | 57.6   | 59.12  | 63.25667 |

|                  |       |       |       |          |
|------------------|-------|-------|-------|----------|
| mmu-miR-1843a-5p | 62.38 | 44.93 | 80.05 | 62.45333 |
| mmu-miR-222-5p   | 44.32 | 62.21 | 77.59 | 61.37333 |
| mmu-miR-1a-3p    | 54.99 | 64.52 | 59.12 | 59.54333 |
| mmu-miR-450b-5p  | 88.65 | 35.71 | 49.26 | 57.87333 |
| mmu-miR-500-3p   | 53.35 | 51.84 | 67.74 | 57.64333 |
| mmu-miR-3068-3p  | 48.43 | 66.82 | 55.42 | 56.89    |
| mmu-miR-10b-3p   | 64.02 | 61.06 | 41.87 | 55.65    |
| mmu-miR-1945     | 45.96 | 73.73 | 45.57 | 55.08667 |
| mmu-miR-1843b-5p | 51.71 | 40.32 | 67.74 | 53.25667 |
| mmu-miR-700-3p   | 31.19 | 54.15 | 73.9  | 53.08    |
| mmu-miR-9-3p     | 59.92 | 63.37 | 35.72 | 53.00333 |
| mmu-miR-2137     | 26.27 | 93.32 | 36.95 | 52.18    |
| mmu-miR-615-3p   | 42.68 | 42.63 | 66.51 | 50.60667 |
| mmu-miR-92b-3p   | 33.65 | 47.24 | 62.81 | 47.9     |
| mmu-miR-93-3p    | 41.86 | 36.87 | 64.04 | 47.59    |
| mmu-miR-296-5p   | 30.37 | 51.84 | 60.35 | 47.52    |
| mmu-miR-7688-5p  | 33.65 | 35.71 | 68.97 | 46.11    |
| mmu-miR-664-5p   | 56.63 | 44.93 | 33.25 | 44.93667 |
| mmu-miR-378a-5p  | 41.86 | 51.84 | 40.64 | 44.78    |
| mmu-miR-877-5p   | 52.53 | 50.69 | 30.79 | 44.67    |
| mmu-miR-501-5p   | 41.86 | 61.06 | 30.79 | 44.57    |
| mmu-let-7e-3p    | 49.25 | 50.69 | 33.25 | 44.39667 |
| mmu-miR-122-5p   | 36.94 | 73.73 | 19.71 | 43.46    |
| mmu-miR-301a-5p  | 50.89 | 43.78 | 34.48 | 43.05    |
| mmu-miR-16-2-3p  | 61.56 | 39.17 | 25.86 | 42.19667 |
| mmu-miR-1187     | 37.76 | 29.95 | 57.88 | 41.86333 |
| mmu-miR-425-3p   | 41.04 | 42.63 | 41.87 | 41.84667 |
| mmu-miR-362-3p   | 48.43 | 33.41 | 39.41 | 40.41667 |
| mmu-miR-1981-3p  | 34.47 | 43.78 | 41.87 | 40.04    |
| mmu-miR-342-5p   | 20.52 | 43.78 | 52.96 | 39.08667 |
| mmu-miR-142a-3p  | 82.08 | 16.13 | 13.55 | 37.25333 |



|                  |       |       |       |          |
|------------------|-------|-------|-------|----------|
| mmu-miR-335-5p   | 53.35 | 38.02 | 16.01 | 35.79333 |
| mmu-miR-296-3p   | 26.27 | 57.6  | 23.4  | 35.75667 |
| mmu-miR-335-3p   | 31.19 | 42.63 | 33.25 | 35.69    |
| mmu-miR-1191a    | 31.19 | 34.56 | 40.64 | 35.46333 |
| mmu-miR-193a-5p  | 29.55 | 48.39 | 28.33 | 35.42333 |
| mmu-miR-374c-5p  | 28.73 | 50.69 | 23.4  | 34.27333 |
| mmu-miR-350-5p   | 27.91 | 43.78 | 30.79 | 34.16    |
| mmu-miR-466h-3p  | 36.94 | 33.41 | 30.79 | 33.71333 |
| mmu-miR-3968     | 18.88 | 38.02 | 43.11 | 33.33667 |
| mmu-miR-669h-5p  | 19.7  | 39.17 | 40.64 | 33.17    |
| mmu-miR-7a-1-3p  | 22.16 | 46.08 | 30.79 | 33.01    |
| mmu-miR-181d-5p  | 27.09 | 41.48 | 28.33 | 32.3     |
| mmu-miR-1949     | 36.11 | 39.17 | 17.24 | 30.84    |
| mmu-miR-301a-3p  | 55.81 | 26.5  | 9.85  | 30.72    |
| mmu-miR-466n-3p  | 40.22 | 25.35 | 22.17 | 29.24667 |
| mmu-miR-19a-3p   | 57.46 | 5.76  | 19.71 | 27.64333 |
| mmu-miR-126a-5p  | 22.98 | 31.11 | 28.33 | 27.47333 |
| mmu-miR-669f-5p  | 29.55 | 33.41 | 18.47 | 27.14333 |
| mmu-miR-669b-5p  | 47.61 | 21.89 | 11.08 | 26.86    |
| mmu-miR-339-3p   | 20.52 | 34.56 | 23.4  | 26.16    |
| mmu-miR-669d-5p  | 44.32 | 18.43 | 14.78 | 25.84333 |
| mmu-miR-700-5p   | 32.01 | 29.95 | 14.78 | 25.58    |
| mmu-miR-29b-1-5p | 18.88 | 27.65 | 29.56 | 25.36333 |
| mmu-miR-708-3p   | 27.91 | 18.43 | 29.56 | 25.3     |
| mmu-miR-215-5p   | 13.13 | 18.43 | 43.11 | 24.89    |
| mmu-miR-27b-5p   | 10.67 | 23.04 | 39.41 | 24.37333 |
| mmu-miR-505-3p   | 22.98 | 29.95 | 19.71 | 24.21333 |
| mmu-let-7f-1-3p  | 20.52 | 21.89 | 29.56 | 23.99    |
| mmu-miR-8114     | 24.62 | 19.59 | 27.09 | 23.76667 |
| mmu-miR-466i-3p  | 32.83 | 13.83 | 24.63 | 23.76333 |
| mmu-miR-3066-5p  | 36.11 | 12.67 | 22.17 | 23.65    |

|                   |       |       |       |          |
|-------------------|-------|-------|-------|----------|
| mmu-miR-877-3p    | 16.42 | 35.71 | 18.47 | 23.53333 |
| mmu-miR-138-5p    | 20.52 | 26.5  | 23.4  | 23.47333 |
| mmu-miR-34b-5p    | 42.68 | 19.59 | 7.39  | 23.22    |
| mmu-miR-331-5p    | 18.88 | 20.74 | 29.56 | 23.06    |
| mmu-miR-532-3p    | 15.6  | 28.8  | 24.63 | 23.01    |
| mmu-miR-3473a     | 16.42 | 25.35 | 27.09 | 22.95333 |
| mmu-miR-125b-2-3p | 22.98 | 20.74 | 24.63 | 22.78333 |
| mmu-miR-200b-3p   | 22.16 | 25.35 | 18.47 | 21.99333 |
| mmu-miR-1943-5p   | 13.95 | 32.26 | 19.71 | 21.97333 |
| mmu-miR-143-5p    | 18.88 | 35.71 | 11.08 | 21.89    |
| mmu-miR-3102-3p   | 11.49 | 24.19 | 29.56 | 21.74667 |
| mmu-miR-466c-5p   | 22.16 | 21.89 | 19.71 | 21.25333 |
| mmu-miR-703       | 17.24 | 29.95 | 16.01 | 21.06667 |
| mmu-miR-450a-1-3p | 33.65 | 9.22  | 18.47 | 20.44667 |
| mmu-miR-503-3p    | 14.77 | 34.56 | 11.08 | 20.13667 |
| mmu-miR-375-3p    | 6.57  | 10.37 | 40.64 | 19.19333 |
| mmu-miR-32-5p     | 44.32 | 6.91  | 6.16  | 19.13    |
| mmu-miR-28c       | 21.34 | 14.98 | 20.94 | 19.08667 |
| mmu-miR-8112      | 20.52 | 2.3   | 30.79 | 17.87    |
| mmu-miR-5113      | 21.34 | 19.59 | 12.32 | 17.75    |
| mmu-miR-148b-5p   | 13.13 | 23.04 | 16.01 | 17.39333 |
| mmu-miR-21a-3p    | 23.8  | 21.89 | 4.93  | 16.87333 |
| mmu-let-7b-3p     | 13.95 | 9.22  | 24.63 | 15.93333 |
| mmu-miR-191-3p    | 8.21  | 16.13 | 23.4  | 15.91333 |
| mmu-miR-1249-3p   | 16.42 | 16.13 | 14.78 | 15.77667 |
| mmu-miR-378d      | 12.31 | 16.13 | 18.47 | 15.63667 |
| mmu-miR-1306-3p   | 13.95 | 12.67 | 19.71 | 15.44333 |
| mmu-miR-3068-5p   | 14.77 | 16.13 | 12.32 | 14.40667 |
| mmu-miR-466i-5p   | 10.67 | 6.91  | 24.63 | 14.07    |
| mmu-miR-1955-5p   | 13.95 | 3.46  | 24.63 | 14.01333 |
| mmu-miR-378b      | 20.52 | 13.83 | 4.93  | 13.09333 |

|                   |       |       |       |          |
|-------------------|-------|-------|-------|----------|
| mmu-miR-195a-5p   | 13.95 | 8.06  | 17.24 | 13.08333 |
| mmu-miR-652-5p    | 16.42 | 14.98 | 7.39  | 12.93    |
| mmu-miR-542-5p    | 11.49 | 13.83 | 12.32 | 12.54667 |
| mmu-miR-181c-5p   | 16.42 | 16.13 | 4.93  | 12.49333 |
| mmu-miR-139-5p    | 13.13 | 18.43 | 4.93  | 12.16333 |
| mmu-miR-24-1-5p   | 18.06 | 6.91  | 11.08 | 12.01667 |
| mmu-miR-1291      | 7.39  | 13.83 | 14.78 | 12       |
| mmu-miR-669e-5p   | 12.31 | 13.83 | 8.62  | 11.58667 |
| mmu-miR-467e-3p   | 18.06 | 9.22  | 6.16  | 11.14667 |
| mmu-miR-1306-5p   | 12.31 | 10.37 | 9.85  | 10.84333 |
| mmu-miR-669f-3p   | 20.52 | 9.22  | 2.46  | 10.73333 |
| mmu-miR-106a-5p   | 13.13 | 10.37 | 8.62  | 10.70667 |
| mmu-miR-466m-3p   | 4.1   | 8.06  | 19.71 | 10.62333 |
| mmu-miR-29c-5p    | 9.03  | 10.37 | 11.08 | 10.16    |
| mmu-miR-3074-5p   | 11.49 | 12.67 | 6.16  | 10.10667 |
| mmu-miR-25-5p     | 14.77 | 6.91  | 8.62  | 10.1     |
| mmu-miR-669k-5p   | 3.28  | 4.61  | 22.17 | 10.02    |
| mmu-miR-1194      | 4.92  | 13.83 | 11.08 | 9.943333 |
| mmu-miR-3082-3p   | 9.03  | 6.91  | 13.55 | 9.83     |
| mmu-miR-146a-5p   | 8.21  | 13.83 | 7.39  | 9.81     |
| mmu-miR-1964-3p   | 4.1   | 12.67 | 12.32 | 9.696667 |
| mmu-miR-3473b     | 11.49 | 12.67 | 4.93  | 9.696667 |
| mmu-miR-3057-5p   | 9.85  | 8.06  | 11.08 | 9.663333 |
| mmu-miR-3061-3p   | 9.85  | 10.37 | 7.39  | 9.203333 |
| mmu-miR-3473d     | 5.75  | 12.67 | 8.62  | 9.013333 |
| mmu-miR-188-5p    | 7.39  | 9.22  | 9.85  | 8.82     |
| mmu-miR-582-5p    | 12.31 | 10.37 | 3.69  | 8.79     |
| mmu-miR-3064-5p   | 15.6  | 8.06  | 2.46  | 8.706667 |
| mmu-miR-33-3p     | 11.49 | 8.06  | 6.16  | 8.57     |
| mmu-miR-3074-1-3p | 7.39  | 5.76  | 12.32 | 8.49     |
| mmu-miR-449a-5p   | 10.67 | 4.61  | 9.85  | 8.376667 |

|                      |       |       |       |          |
|----------------------|-------|-------|-------|----------|
| mmu-miR-379-5p       | 8.21  | 6.91  | 9.85  | 8.323333 |
| mmu-miR-1839-3p      | 8.21  | 8.06  | 8.62  | 8.296667 |
| mmu-miR-101c         | 11.49 | 5.76  | 7.39  | 8.213333 |
| mmu-miR-203-3p       | 9.03  | 5.76  | 9.85  | 8.213333 |
| mmu-miR-301b-3p      | 9.03  | 14.98 | 0     | 8.003333 |
| mmu-miR-148a-3p      | 8.21  | 3.46  | 12.32 | 7.996667 |
| mmu-miR-466h-5p      | 9.85  | 11.52 | 2.46  | 7.943333 |
| mmu-miR-541-5p       | 4.1   | 5.76  | 13.55 | 7.803333 |
| mmu-miR-147-5p       | 7.39  | 6.91  | 8.62  | 7.64     |
| mmu-miR-20a-3p       | 15.6  | 6.91  | 0     | 7.503333 |
| mmu-miR-669p-3p      | 10.67 | 8.06  | 3.69  | 7.473333 |
| mmu-miR-466b-5p      | 17.24 | 1.15  | 3.69  | 7.36     |
| mmu-miR-466o-5p      | 17.24 | 1.15  | 3.69  | 7.36     |
| mmu-miR-5123         | 9.03  | 8.06  | 4.93  | 7.34     |
| mmu-miR-1948-3p      | 9.85  | 2.3   | 9.85  | 7.333333 |
| mmu-miR-34a-3p       | 5.75  | 4.61  | 11.08 | 7.146667 |
| mmu-miR-16-1-3p      | 8.21  | 6.91  | 6.16  | 7.093333 |
| mmu-miR-3473e        | 9.03  | 9.22  | 2.46  | 6.903333 |
| mmu-miR-451a         | 8.21  | 10.37 | 1.23  | 6.603333 |
| mmu-miR-5126         | 4.1   | 6.91  | 8.62  | 6.543333 |
| mmu-miR-3086-5p      | 9.85  | 2.3   | 7.39  | 6.513333 |
| mmu-miR-467c-3p      | 9.85  | 5.76  | 3.69  | 6.433333 |
| mmu-miR-669a-3-3p    | 9.03  | 2.3   | 7.39  | 6.24     |
| mmu-miR-150-5p       | 4.1   | 6.91  | 7.39  | 6.133333 |
| mmu-miR-27a-5p       | 2.46  | 1.15  | 14.78 | 6.13     |
| mmu-miR-193a-3p      | 4.92  | 2.3   | 11.08 | 6.1      |
| mmu-miR-182-3p       | 2.46  | 3.46  | 12.32 | 6.08     |
| mmu-miR-21b          | 7.39  | 5.76  | 4.93  | 6.026667 |
| mmu-miR-129-1-3p     | 5.75  | 4.61  | 7.39  | 5.916667 |
| mmu-miR-3102-3p.2-3p | 3.28  | 8.06  | 6.16  | 5.833333 |

|                   |       |      |       |          |
|-------------------|-------|------|-------|----------|
| mmu-miR-744-3p    | 4.1   | 3.46 | 9.85  | 5.803333 |
| mmu-miR-7061-5p   | 2.46  | 0    | 14.78 | 5.746667 |
| mmu-miR-351-3p    | 6.57  | 6.91 | 3.69  | 5.723333 |
| mmu-miR-491-3p    | 4.92  | 4.61 | 7.39  | 5.64     |
| mmu-miR-500-5p    | 2.46  | 4.61 | 9.85  | 5.64     |
| mmu-miR-3089-3p   | 7.39  | 6.91 | 2.46  | 5.586667 |
| mmu-miR-32-3p     | 5.75  | 3.46 | 7.39  | 5.533333 |
| mmu-miR-340-5p    | 4.1   | 1.15 | 11.08 | 5.443333 |
| mmu-miR-29b-2-5p  | 0.82  | 8.06 | 7.39  | 5.423333 |
| mmu-miR-670-5p    | 0     | 0    | 16.01 | 5.336667 |
| mmu-let-7f-2-3p   | 5.75  | 4.61 | 4.93  | 5.096667 |
| mmu-miR-466k      | 13.95 | 1.15 | 0     | 5.033333 |
| mmu-miR-1191b-5p  | 4.1   | 3.46 | 7.39  | 4.983333 |
| mmu-miR-29a-5p    | 9.03  | 4.61 | 1.23  | 4.956667 |
| mmu-miR-449c-5p   | 4.1   | 5.76 | 4.93  | 4.93     |
| mmu-miR-219a-1-3p | 6.57  | 8.06 | 0     | 4.876667 |
| mmu-miR-1b-5p     | 7.39  | 3.46 | 3.69  | 4.846667 |
| mmu-miR-152-5p    | 8.21  | 0    | 6.16  | 4.79     |
| mmu-miR-3076-3p   | 4.92  | 8.06 | 1.23  | 4.736667 |
| mmu-miR-6238      | 5.75  | 2.3  | 6.16  | 4.736667 |
| mmu-miR-1843b-3p  | 2.46  | 8.06 | 3.69  | 4.736667 |
| mmu-miR-669m-3p   | 5.75  | 4.61 | 3.69  | 4.683333 |
| mmu-miR-760-3p    | 5.75  | 5.76 | 2.46  | 4.656667 |
| mmu-miR-6900-3p   | 1.64  | 5.76 | 6.16  | 4.52     |
| mmu-miR-466e-5p   | 9.85  | 0    | 3.69  | 4.513333 |
| mmu-miR-702-3p    | 2.46  | 5.76 | 4.93  | 4.383333 |
| mmu-miR-6516-3p   | 10.67 | 0    | 2.46  | 4.376667 |
| mmu-miR-7021-5p   | 3.28  | 3.46 | 6.16  | 4.3      |
| mmu-miR-7669-5p   | 3.28  | 3.46 | 6.16  | 4.3      |
| mmu-miR-130a-5p   | 5.75  | 4.61 | 2.46  | 4.273333 |
| mmu-miR-3470b     | 5.75  | 5.76 | 1.23  | 4.246667 |

|                  |      |      |      |          |
|------------------|------|------|------|----------|
| mmu-miR-466m-5p  | 6.57 | 3.46 | 2.46 | 4.163333 |
| mmu-miR-103-2-5p | 1.64 | 3.46 | 7.39 | 4.163333 |
| mmu-miR-1195     | 4.1  | 5.76 | 2.46 | 4.106667 |
| mmu-miR-6975-3p  | 0    | 2.3  | 9.85 | 4.05     |
| mmu-miR-190a-5p  | 7.39 | 3.46 | 1.23 | 4.026667 |
| mmu-miR-3965     | 4.92 | 4.61 | 2.46 | 3.996667 |
| mmu-miR-497a-5p  | 4.92 | 4.61 | 2.46 | 3.996667 |
| mmu-miR-7b-5p    | 5.75 | 3.46 | 2.46 | 3.89     |
| mmu-miR-26a-2-3p | 3.28 | 3.46 | 4.93 | 3.89     |
| mmu-miR-297a-5p  | 9.03 | 0    | 2.46 | 3.83     |
| mmu-miR-338-5p   | 1.64 | 1.15 | 8.62 | 3.803333 |
| mmu-miR-669m-5p  | 6.57 | 2.3  | 2.46 | 3.776667 |
| mmu-miR-147-3p   | 1.64 | 3.46 | 6.16 | 3.753333 |
| mmu-miR-3058-3p  | 1.64 | 5.76 | 3.69 | 3.696667 |
| mmu-miR-3084-3p  | 1.64 | 5.76 | 3.69 | 3.696667 |
| mmu-miR-3060-3p  | 4.1  | 6.91 | 0    | 3.67     |
| mmu-miR-193b-5p  | 0    | 1.15 | 9.85 | 3.666667 |
| mmu-miR-3084-5p  | 4.92 | 2.3  | 3.69 | 3.636667 |
| mmu-miR-7070-3p  | 0    | 6.91 | 3.69 | 3.533333 |
| mmu-miR-6239     | 5.75 | 1.15 | 3.69 | 3.53     |
| mmu-miR-3470a    | 2.46 | 8.06 | 0    | 3.506667 |
| mmu-miR-1934-5p  | 0.82 | 2.3  | 7.39 | 3.503333 |
| mmu-miR-3062-5p  | 5.75 | 3.46 | 1.23 | 3.48     |
| mmu-miR-467h     | 5.75 | 4.61 | 0    | 3.453333 |
| mmu-miR-30c-1-3p | 6.57 | 0    | 3.69 | 3.42     |
| mmu-miR-96-3p    | 4.1  | 1.15 | 4.93 | 3.393333 |
| mmu-miR-20b-5p   | 6.57 | 2.3  | 1.23 | 3.366667 |
| mmu-miR-3970     | 4.1  | 3.46 | 2.46 | 3.34     |
| mmu-miR-1930-5p  | 2.46 | 0    | 7.39 | 3.283333 |
| mmu-miR-23b-5p   | 1.64 | 6.91 | 1.23 | 3.26     |
| mmu-miR-7033-5p  | 0    | 2.3  | 7.39 | 3.23     |

|                  |      |      |      |          |
|------------------|------|------|------|----------|
| mmu-miR-7235-3p  | 2.46 | 3.46 | 3.69 | 3.203333 |
| mmu-miR-466p-5p  | 4.92 | 4.61 | 0    | 3.176667 |
| mmu-miR-467g     | 2.46 | 5.76 | 1.23 | 3.15     |
| mmu-miR-344-3p   | 0.82 | 0    | 8.62 | 3.146667 |
| mmu-miR-505-5p   | 2.46 | 6.91 | 0    | 3.123333 |
| mmu-miR-30d-3p   | 3.28 | 2.3  | 3.69 | 3.09     |
| mmu-miR-669b-3p  | 3.28 | 4.61 | 1.23 | 3.04     |
| mmu-miR-186-3p   | 1.64 | 2.3  | 4.93 | 2.956667 |
| mmu-miR-365-2-5p | 4.1  | 2.3  | 2.46 | 2.953333 |
| mmu-miR-466o-3p  | 1.64 | 3.46 | 3.69 | 2.93     |
| mmu-miR-5114     | 4.1  | 4.61 | 0    | 2.903333 |
| mmu-miR-669g     | 0    | 0    | 8.62 | 2.873333 |
| mmu-miR-219a-5p  | 0    | 1.15 | 7.39 | 2.846667 |
| mmu-miR-6951-5p  | 0    | 1.15 | 7.39 | 2.846667 |
| mmu-miR-200c-3p  | 4.92 | 2.3  | 1.23 | 2.816667 |
| mmu-miR-6994-3p  | 0    | 3.46 | 4.93 | 2.796667 |
| mmu-miR-7680-3p  | 2.46 | 3.46 | 2.46 | 2.793333 |
| mmu-miR-184-3p   | 0    | 4.61 | 3.69 | 2.766667 |
| mmu-miR-467b-3p  | 0.82 | 0    | 7.39 | 2.736667 |
| mmu-miR-466j     | 5.75 | 1.15 | 1.23 | 2.71     |
| mmu-miR-466f     | 3.28 | 1.15 | 3.69 | 2.706667 |
| mmu-miR-6944-3p  | 0    | 8.06 | 0    | 2.686667 |
| mmu-miR-26b-3p   | 3.28 | 2.3  | 2.46 | 2.68     |
| mmu-miR-3075-5p  | 3.28 | 2.3  | 2.46 | 2.68     |
| mmu-miR-187-3p   | 0.82 | 4.61 | 2.46 | 2.63     |
| mmu-miR-669e-3p  | 3.28 | 4.61 | 0    | 2.63     |
| mmu-miR-429-3p   | 1.64 | 0    | 6.16 | 2.6      |
| mmu-miR-6418-3p  | 1.64 | 0    | 6.16 | 2.6      |
| mmu-miR-8094     | 1.64 | 0    | 6.16 | 2.6      |
| mmu-miR-3473h-5p | 1.64 | 1.15 | 4.93 | 2.573333 |
| mmu-miR-3962     | 4.1  | 1.15 | 2.46 | 2.57     |

|                  |      |      |      |          |
|------------------|------|------|------|----------|
| mmu-miR-30b-3p   | 4.1  | 2.3  | 1.23 | 2.543333 |
| mmu-miR-7117-5p  | 0    | 0    | 7.39 | 2.463333 |
| mmu-miR-19b-1-5p | 4.92 | 0    | 2.46 | 2.46     |
| mmu-miR-7091-5p  | 2.46 | 2.3  | 2.46 | 2.406667 |
| mmu-miR-344d-3p  | 0    | 3.46 | 3.69 | 2.383333 |
| mmu-miR-6932-5p  | 0    | 3.46 | 3.69 | 2.383333 |
| mmu-miR-6967-3p  | 2.46 | 3.46 | 1.23 | 2.383333 |
| mmu-miR-6516-5p  | 3.28 | 2.3  | 1.23 | 2.27     |
| mmu-miR-1931     | 0.82 | 4.61 | 1.23 | 2.22     |
| mmu-miR-5128     | 0.82 | 4.61 | 1.23 | 2.22     |
| mmu-miR-7018-3p  | 1.64 | 0    | 4.93 | 2.19     |
| mmu-miR-6960-5p  | 4.1  | 0    | 2.46 | 2.186667 |
| mmu-miR-491-5p   | 4.1  | 1.15 | 1.23 | 2.16     |
| mmu-miR-15a-3p   | 1.64 | 2.3  | 2.46 | 2.133333 |
| mmu-miR-210-5p   | 1.64 | 2.3  | 2.46 | 2.133333 |
| mmu-miR-218-1-3p | 1.64 | 2.3  | 2.46 | 2.133333 |
| mmu-miR-470-5p   | 4.1  | 2.3  | 0    | 2.133333 |
| mmu-miR-301b-5p  | 1.64 | 4.61 | 0    | 2.083333 |
| mmu-miR-144-5p   | 0    | 0    | 6.16 | 2.053333 |
| mmu-miR-712-3p   | 0    | 0    | 6.16 | 2.053333 |
| mmu-miR-421-5p   | 2.46 | 0    | 3.69 | 2.05     |
| mmu-miR-190b-3p  | 0    | 1.15 | 4.93 | 2.026667 |
| mmu-miR-298-3p   | 0    | 1.15 | 4.93 | 2.026667 |
| mmu-miR-499-5p   | 4.92 | 1.15 | 0    | 2.023333 |
| mmu-miR-194-2-3p | 0    | 2.3  | 3.69 | 1.996667 |
| mmu-miR-411-3p   | 2.46 | 2.3  | 1.23 | 1.996667 |
| mmu-miR-677-5p   | 2.46 | 2.3  | 1.23 | 1.996667 |
| mmu-miR-6896-5p  | 2.46 | 2.3  | 1.23 | 1.996667 |
| mmu-miR-1970c-5p | 2.46 | 3.46 | 0    | 1.973333 |
| mmu-miR-26a-1-3p | 2.46 | 3.46 | 0    | 1.973333 |
| mmu-miR-5132-5p  | 0    | 3.46 | 2.46 | 1.973333 |



|                   |      |      |      |          |
|-------------------|------|------|------|----------|
| mmu-miR-465c-5p   | 0    | 4.61 | 1.23 | 1.946667 |
| mmu-miR-6236      | 0    | 4.61 | 1.23 | 1.946667 |
| mmu-miR-7654-5p   | 0    | 5.76 | 0    | 1.92     |
| mmu-miR-466f-5p   | 0.82 | 1.15 | 3.69 | 1.886667 |
| mmu-miR-466l-3p   | 0.82 | 1.15 | 3.69 | 1.886667 |
| mmu-miR-5100      | 3.28 | 1.15 | 1.23 | 1.886667 |
| mmu-let-7g-3p     | 3.28 | 2.3  | 0    | 1.86     |
| mmu-miR-145b      | 0.82 | 2.3  | 2.46 | 1.86     |
| mmu-miR-1843a-3p  | 3.28 | 2.3  | 0    | 1.86     |
| mmu-miR-1982-3p   | 0.82 | 2.3  | 2.46 | 1.86     |
| mmu-miR-3061-5p   | 3.28 | 2.3  | 0    | 1.86     |
| mmu-miR-3963      | 0.82 | 2.3  | 2.46 | 1.86     |
| mmu-miR-6967-5p   | 3.28 | 2.3  | 0    | 1.86     |
| mmu-miR-7224-3p   | 1.64 | 0    | 3.69 | 1.776667 |
| mmu-miR-155-3p    | 1.64 | 1.15 | 2.46 | 1.75     |
| mmu-miR-181a-2-3p | 1.64 | 3.46 | 0    | 1.7      |
| mmu-miR-1929-5p   | 1.64 | 3.46 | 0    | 1.7      |
| mmu-miR-1950      | 0    | 0    | 4.93 | 1.643333 |
| mmu-miR-7042-5p   | 0    | 0    | 4.93 | 1.643333 |
| mmu-miR-7647-5p   | 0    | 0    | 4.93 | 1.643333 |
| mmu-miR-7667-3p   | 0    | 0    | 4.93 | 1.643333 |
| mmu-miR-7672-5p   | 0    | 0    | 4.93 | 1.643333 |
| mmu-miR-23a-5p    | 2.46 | 2.3  | 0    | 1.586667 |
| mmu-miR-92a-1-5p  | 0    | 3.46 | 1.23 | 1.563333 |
| mmu-miR-219c-5p   | 0    | 4.61 | 0    | 1.536667 |
| mmu-miR-3112-5p   | 0    | 4.61 | 0    | 1.536667 |
| mmu-miR-7118-3p   | 0    | 4.61 | 0    | 1.536667 |
| mmu-miR-3058-5p   | 0.82 | 0    | 3.69 | 1.503333 |
| mmu-miR-3098-3p   | 3.28 | 0    | 1.23 | 1.503333 |
| mmu-miR-7669-3p   | 0.82 | 0    | 3.69 | 1.503333 |
| mmu-miR-1933-3p   | 0.82 | 1.15 | 2.46 | 1.476667 |

|                   |      |      |      |          |
|-------------------|------|------|------|----------|
| mmu-miR-21c       | 3.28 | 1.15 | 0    | 1.476667 |
| mmu-miR-409-3p    | 3.28 | 1.15 | 0    | 1.476667 |
| mmu-miR-181a-1-3p | 0.82 | 3.46 | 0    | 1.426667 |
| mmu-miR-3063-3p   | 0.82 | 3.46 | 0    | 1.426667 |
| mmu-miR-466a-5p   | 0.82 | 3.46 | 0    | 1.426667 |
| mmu-miR-7664-3p   | 0.82 | 3.46 | 0    | 1.426667 |
| mmu-miR-7667-5p   | 1.64 | 0    | 2.46 | 1.366667 |
| mmu-miR-12194-3p  | 1.64 | 2.3  | 0    | 1.313333 |
| mmu-miR-1955-3p   | 1.64 | 2.3  | 0    | 1.313333 |
| mmu-miR-1969      | 1.64 | 2.3  | 0    | 1.313333 |
| mmu-miR-28b       | 1.64 | 2.3  | 0    | 1.313333 |
| mmu-miR-6900-5p   | 1.64 | 2.3  | 0    | 1.313333 |
| mmu-miR-881-3p    | 1.64 | 2.3  | 0    | 1.313333 |
| mmu-miR-12196-3p  | 0    | 0    | 3.69 | 1.23     |
| mmu-miR-135a-2-3p | 0    | 0    | 3.69 | 1.23     |
| mmu-miR-154-3p    | 0    | 0    | 3.69 | 1.23     |
| mmu-miR-1968-5p   | 0    | 0    | 3.69 | 1.23     |
| mmu-miR-3101-5p   | 0    | 0    | 3.69 | 1.23     |
| mmu-miR-6538      | 0    | 0    | 3.69 | 1.23     |
| mmu-miR-677-3p    | 0    | 0    | 3.69 | 1.23     |
| mmu-miR-6952-5p   | 0    | 0    | 3.69 | 1.23     |
| mmu-miR-7092-3p   | 0    | 0    | 3.69 | 1.23     |
| mmu-miR-8105      | 2.46 | 0    | 1.23 | 1.23     |
| mmu-miR-1941-5p   | 0    | 1.15 | 2.46 | 1.203333 |
| mmu-miR-376a-5p   | 2.46 | 1.15 | 0    | 1.203333 |
| mmu-miR-494-3p    | 0    | 1.15 | 2.46 | 1.203333 |
| mmu-miR-7070-5p   | 0    | 1.15 | 2.46 | 1.203333 |
| mmu-miR-7075-3p   | 0    | 1.15 | 2.46 | 1.203333 |
| mmu-miR-7689-3p   | 2.46 | 1.15 | 0    | 1.203333 |
| mmu-miR-5615-5p   | 0    | 2.3  | 1.23 | 1.176667 |
| mmu-miR-6899-3p   | 0    | 2.3  | 1.23 | 1.176667 |

|                    |      |      |      |          |
|--------------------|------|------|------|----------|
| mmu-miR-6939-3p    | 0    | 2.3  | 1.23 | 1.176667 |
| mmu-miR-7663-3p    | 0    | 2.3  | 1.23 | 1.176667 |
| mmu-miR-100-3p     | 0    | 3.46 | 0    | 1.153333 |
| mmu-miR-12189-3p   | 0    | 3.46 | 0    | 1.153333 |
| mmu-miR-138-1-3p   | 0    | 3.46 | 0    | 1.153333 |
| mmu-miR-3544-5p    | 0    | 3.46 | 0    | 1.153333 |
| mmu-miR-6970-5p    | 0    | 3.46 | 0    | 1.153333 |
| mmu-miR-6998-3p    | 0    | 3.46 | 0    | 1.153333 |
| mmu-miR-7068-3p    | 0    | 3.46 | 0    | 1.153333 |
| mmu-miR-7658-5p    | 0    | 3.46 | 0    | 1.153333 |
| mmu-miR-135b-5p    | 0.82 | 0    | 2.46 | 1.093333 |
| mmu-miR-138-2-3p   | 0.82 | 0    | 2.46 | 1.093333 |
| mmu-miR-1934-3p    | 0.82 | 0    | 2.46 | 1.093333 |
| mmu-miR-215-3p     | 0.82 | 0    | 2.46 | 1.093333 |
| mmu-miR-3066-3p    | 0.82 | 0    | 2.46 | 1.093333 |
| mmu-miR-3095-3p    | 0.82 | 0    | 2.46 | 1.093333 |
| mmu-miR-6911-3p    | 0.82 | 0    | 2.46 | 1.093333 |
| mmu-let-7c-1-3p    | 0.82 | 1.15 | 1.23 | 1.066667 |
| mmu-miR-5132-3p    | 0.82 | 1.15 | 1.23 | 1.066667 |
| mmu-miR-450a-2-3p  | 0.82 | 2.3  | 0    | 1.04     |
| mmu-miR-871-3p     | 1.64 | 0    | 1.23 | 0.956667 |
| mmu-miR-1941-3p    | 1.64 | 1.15 | 0    | 0.93     |
| mmu-miR-3102-5p.2- |      |      |      |          |
| 5p                 | 1.64 | 1.15 | 0    | 0.93     |
| mmu-miR-369-3p     | 1.64 | 1.15 | 0    | 0.93     |
| mmu-miR-706        | 1.64 | 1.15 | 0    | 0.93     |
| mmu-miR-7061-3p    | 1.64 | 1.15 | 0    | 0.93     |
| mmu-miR-133a-3p    | 0    | 0    | 2.46 | 0.82     |
| mmu-miR-1936       | 0    | 0    | 2.46 | 0.82     |
| mmu-miR-196b-3p    | 0    | 0    | 2.46 | 0.82     |
| mmu-miR-3069-5p    | 0    | 0    | 2.46 | 0.82     |

|                 |      |      |      |          |
|-----------------|------|------|------|----------|
| mmu-miR-487b-3p | 0    | 0    | 2.46 | 0.82     |
| mmu-miR-676-3p  | 0    | 0    | 2.46 | 0.82     |
| mmu-miR-7016-3p | 0    | 0    | 2.46 | 0.82     |
| mmu-miR-7219-3p | 0    | 0    | 2.46 | 0.82     |
| mmu-miR-185-3p  | 0    | 2.3  | 0    | 0.766667 |
| mmu-miR-1895    | 0    | 2.3  | 0    | 0.766667 |
| mmu-miR-1947-5p | 0    | 2.3  | 0    | 0.766667 |
| mmu-miR-223-3p  | 0    | 2.3  | 0    | 0.766667 |
| mmu-miR-3094-3p | 0    | 2.3  | 0    | 0.766667 |
| mmu-miR-3103-5p | 0    | 2.3  | 0    | 0.766667 |
| mmu-miR-382-3p  | 0    | 2.3  | 0    | 0.766667 |
| mmu-miR-493-5p  | 0    | 2.3  | 0    | 0.766667 |
| mmu-miR-6911-5p | 0    | 2.3  | 0    | 0.766667 |
| mmu-miR-6940-3p | 0    | 2.3  | 0    | 0.766667 |
| mmu-miR-6942-5p | 0    | 2.3  | 0    | 0.766667 |
| mmu-miR-6948-5p | 0    | 2.3  | 0    | 0.766667 |
| mmu-miR-6977-3p | 0    | 2.3  | 0    | 0.766667 |
| mmu-miR-6990-5p | 0    | 2.3  | 0    | 0.766667 |
| mmu-miR-702-5p  | 0    | 2.3  | 0    | 0.766667 |
| mmu-miR-7679-3p | 0    | 2.3  | 0    | 0.766667 |
| mmu-miR-1198-3p | 0.82 | 0    | 1.23 | 0.683333 |
| mmu-miR-5709-5p | 0.82 | 0    | 1.23 | 0.683333 |
| mmu-miR-6988-3p | 0.82 | 0    | 1.23 | 0.683333 |
| mmu-miR-7660-3p | 0.82 | 0    | 1.23 | 0.683333 |
| mmu-miR-374c-3p | 0.82 | 1.15 | 0    | 0.656667 |
| mmu-miR-6966-5p | 0.82 | 1.15 | 0    | 0.656667 |
| mmu-miR-7025-3p | 0.82 | 1.15 | 0    | 0.656667 |
| mmu-miR-709     | 0.82 | 1.15 | 0    | 0.656667 |
| mmu-miR-7240-5p | 0.82 | 1.15 | 0    | 0.656667 |
| mmu-miR-142b    | 0    | 0    | 1.23 | 0.41     |
| mmu-miR-1971    | 0    | 0    | 1.23 | 0.41     |

|                  |   |      |      |          |
|------------------|---|------|------|----------|
| mmu-miR-3087-3p  | 0 | 0    | 1.23 | 0.41     |
| mmu-miR-3102-5p  | 0 | 0    | 1.23 | 0.41     |
| mmu-miR-340-3p   | 0 | 0    | 1.23 | 0.41     |
| mmu-miR-3473f    | 0 | 0    | 1.23 | 0.41     |
| mmu-miR-3474     | 0 | 0    | 1.23 | 0.41     |
| mmu-miR-3967     | 0 | 0    | 1.23 | 0.41     |
| mmu-miR-6546-5p  | 0 | 0    | 1.23 | 0.41     |
| mmu-miR-6937-5p  | 0 | 0    | 1.23 | 0.41     |
| mmu-miR-6968-3p  | 0 | 0    | 1.23 | 0.41     |
| mmu-miR-7016-5p  | 0 | 0    | 1.23 | 0.41     |
| mmu-miR-7656-5p  | 0 | 0    | 1.23 | 0.41     |
| mmu-miR-7682-3p  | 0 | 0    | 1.23 | 0.41     |
| mmu-let-7k       | 0 | 1.15 | 0    | 0.383333 |
| mmu-miR-12201-5p | 0 | 1.15 | 0    | 0.383333 |
| mmu-miR-12202-3p | 0 | 1.15 | 0    | 0.383333 |
| mmu-miR-154-5p   | 0 | 1.15 | 0    | 0.383333 |
| mmu-miR-205-5p   | 0 | 1.15 | 0    | 0.383333 |
| mmu-miR-299a-3p  | 0 | 1.15 | 0    | 0.383333 |
| mmu-miR-3057-3p  | 0 | 1.15 | 0    | 0.383333 |
| mmu-miR-3097-5p  | 0 | 1.15 | 0    | 0.383333 |
| mmu-miR-3108-5p  | 0 | 1.15 | 0    | 0.383333 |
| mmu-miR-3109-5p  | 0 | 1.15 | 0    | 0.383333 |
| mmu-miR-3110-5p  | 0 | 1.15 | 0    | 0.383333 |
| mmu-miR-329-5p   | 0 | 1.15 | 0    | 0.383333 |
| mmu-miR-3473g    | 0 | 1.15 | 0    | 0.383333 |
| mmu-miR-465a-3p  | 0 | 1.15 | 0    | 0.383333 |
| mmu-miR-465b-3p  | 0 | 1.15 | 0    | 0.383333 |
| mmu-miR-465c-3p  | 0 | 1.15 | 0    | 0.383333 |
| mmu-miR-5124a    | 0 | 1.15 | 0    | 0.383333 |
| mmu-miR-5129-3p  | 0 | 1.15 | 0    | 0.383333 |
| mmu-miR-5134-3p  | 0 | 1.15 | 0    | 0.383333 |

|                 |   |      |   |          |
|-----------------|---|------|---|----------|
| mmu-miR-6897-5p | 0 | 1.15 | 0 | 0.383333 |
| mmu-miR-6916-5p | 0 | 1.15 | 0 | 0.383333 |
| mmu-miR-6935-3p | 0 | 1.15 | 0 | 0.383333 |
| mmu-miR-6935-5p | 0 | 1.15 | 0 | 0.383333 |
| mmu-miR-6945-3p | 0 | 1.15 | 0 | 0.383333 |
| mmu-miR-6946-3p | 0 | 1.15 | 0 | 0.383333 |
| mmu-miR-6963-5p | 0 | 1.15 | 0 | 0.383333 |
| mmu-miR-6996-3p | 0 | 1.15 | 0 | 0.383333 |
| mmu-miR-6997-3p | 0 | 1.15 | 0 | 0.383333 |
| mmu-miR-7002-3p | 0 | 1.15 | 0 | 0.383333 |
| mmu-miR-7008-5p | 0 | 1.15 | 0 | 0.383333 |
| mmu-miR-7014-5p | 0 | 1.15 | 0 | 0.383333 |
| mmu-miR-7034-5p | 0 | 1.15 | 0 | 0.383333 |
| mmu-miR-7065-3p | 0 | 1.15 | 0 | 0.383333 |
| mmu-miR-7068-5p | 0 | 1.15 | 0 | 0.383333 |
| mmu-miR-7069-5p | 0 | 1.15 | 0 | 0.383333 |
| mmu-miR-741-3p  | 0 | 1.15 | 0 | 0.383333 |
| mmu-miR-7655-5p | 0 | 1.15 | 0 | 0.383333 |
| mmu-miR-7658-3p | 0 | 1.15 | 0 | 0.383333 |
| mmu-miR-7666-3p | 0 | 1.15 | 0 | 0.383333 |
| mmu-miR-8098    | 0 | 1.15 | 0 | 0.383333 |
| mmu-miR-8106    | 0 | 1.15 | 0 | 0.383333 |
| mmu-miR-873a-5p | 0 | 1.15 | 0 | 0.383333 |

---
