# Supplementary material for: Exosomal miRNAs from Prostate Cancer Impair Osteoblast Function in Mice
Source: MDPI journal article supplement (doi:10.3390/ijms23031285), 2022-01-24
Supplement: s1 [file s1]

**Suppl. Table S2. Differentially expressed genes in osteoprogenitors treated with RM1-BM EVs.**

| Gene_Symbol | log2FoldChange | padj     |
|-------------|----------------|----------|
| Pcdh20      | -1.16          | 4.99E-06 |
| Sema3d      | -0.85          | 0.009494 |
| Ptprz1      | -0.84          | 0.000685 |
| Igfbp2      | -0.78          | 0.006152 |
| Atoh8       | -0.76          | 0.009491 |
| Thsd4       | -0.75          | 0.001378 |
| Celf5       | -0.74          | 0.012577 |
| Slc13a5     | -0.74          | 0.025799 |
| Nell2       | -0.74          | 0.045318 |
| Igsf9b      | -0.72          | 0.023355 |
| Clec11a     | -0.71          | 0.001588 |
| Npnt        | -0.71          | 0.006152 |
| Lmo7        | -0.71          | 0.018204 |
| Shank1      | -0.71          | 0.019295 |
| Tnfrsf19    | -0.71          | 0.024288 |
| Col25a1     | -0.71          | 0.048557 |
| Ptprv       | -0.7           | 0.021159 |
| Bmp2        | -0.7           | 0.02901  |
| Fam129a     | -0.69          | 0.000685 |
| Epha3       | -0.68          | 0.003084 |
| Col8a2      | -0.68          | 0.023866 |
| Cobll1      | -0.68          | 0.031104 |
| Irx3        | -0.65          | 0.001105 |
| Fat1        | -0.65          | 0.002112 |
| Fzd5        | -0.63          | 0.013333 |
| Ano3        | -0.63          | 0.045713 |

|         |       |          |
|---------|-------|----------|
| Sacs    | -0.61 | 0.020581 |
| Fat4    | -0.61 | 0.024161 |
| Cat     | -0.6  | 0.006504 |
| Igsf10  | -0.59 | 0.015244 |
| Rap1gap | -0.59 | 0.038072 |
| Myom1   | -0.59 | 0.04006  |
| Slit3   | -0.56 | 0.012966 |
| Cdh2    | -0.56 | 0.027717 |
| Cdh11   | -0.55 | 0.004429 |
| Ddr2    | -0.55 | 0.019212 |
| Itga1   | -0.54 | 0.00823  |
| Ahnak   | -0.54 | 0.012966 |
| Dpysl3  | -0.54 | 0.021159 |
| Ptpn13  | -0.54 | 0.037352 |
| Tiam2   | -0.54 | 0.041026 |
| Setbp1  | -0.54 | 0.046022 |
| Adgrf5  | -0.53 | 0.025356 |
| Myo6    | -0.53 | 0.044729 |
| Gria3   | -0.52 | 0.020581 |
| Ltbp1   | -0.52 | 0.023526 |
| Casc4   | -0.52 | 0.033809 |
| Gpc6    | -0.52 | 0.039801 |
| Id3     | -0.51 | 0.005533 |
| Gclm    | -0.51 | 0.009655 |
| Sytl2   | -0.51 | 0.035367 |
| Cspg4   | -0.51 | 0.049422 |
| Hspg2   | -0.5  | 0.012966 |
| Kcnj2   | -0.49 | 0.028001 |
| Dnm3os  | -0.49 | 0.034137 |
| Scarf2  | -0.49 | 0.044729 |
| Rnd3    | -0.49 | 0.045811 |

|          |       |          |
|----------|-------|----------|
| Ptpn14   | -0.48 | 0.019375 |
| Qsox1    | -0.48 | 0.029135 |
| Unc5b    | -0.47 | 0.013707 |
| Prrx1    | -0.47 | 0.024967 |
| Klf10    | -0.47 | 0.042421 |
| Postn    | -0.46 | 0.000542 |
| Fgfr1    | -0.45 | 0.016333 |
| Slc30a4  | -0.45 | 0.023142 |
| Ank      | -0.45 | 0.036827 |
| Cacna1g  | -0.45 | 0.041419 |
| Utrn     | -0.45 | 0.045767 |
| Dkk3     | -0.45 | 0.045811 |
| Akap12   | -0.44 | 0.022634 |
| Myh10    | -0.44 | 0.036884 |
| Ccnd2    | -0.42 | 0.037181 |
| Kirrel   | -0.42 | 0.038614 |
| Rai14    | -0.42 | 0.046022 |
| Igf1r    | -0.42 | 0.046462 |
| Macf1    | -0.41 | 0.028827 |
| Cmtm4    | -0.41 | 0.039029 |
| Ccnd1    | -0.41 | 0.048307 |
| Msrb3    | -0.4  | 0.02507  |
| Neol     | -0.4  | 0.038614 |
| Lipa     | -0.4  | 0.039801 |
| Dst      | -0.39 | 0.043191 |
| Cpe      | -0.38 | 0.031256 |
| Thbs2    | -0.38 | 0.049422 |
| Pkd1     | -0.37 | 0.041328 |
| Golim4   | -0.36 | 0.031859 |
| Cdc42bpa | -0.36 | 0.043191 |
| Pltp     | 0.32  | 0.04184  |

|         |      |          |
|---------|------|----------|
| Rps3    | 0.33 | 0.04028  |
| Cyth1   | 0.34 | 0.049398 |
| Ncapg2  | 0.35 | 0.031104 |
| Atp13a2 | 0.36 | 0.016844 |
| Rps14   | 0.36 | 0.022582 |
| Abca1   | 0.36 | 0.023526 |
| Fxyd5   | 0.36 | 0.048412 |
| Pld4    | 0.37 | 0.021159 |
| Gm6204  | 0.37 | 0.024572 |
| Tmsb4x  | 0.37 | 0.046022 |
| C1qb    | 0.38 | 0.020581 |
| Rpl41   | 0.38 | 0.030892 |
| Cxcr4   | 0.39 | 0.020581 |
| Ctsl    | 0.4  | 0.035113 |
| C1qc    | 0.42 | 0.024155 |
| Cd72    | 0.42 | 0.03273  |
| Ctsc    | 0.42 | 0.03883  |
| Cyba    | 0.42 | 0.048943 |
| Ifi207  | 0.43 | 0.018204 |
| Trafd1  | 0.43 | 0.023526 |
| Aoah    | 0.43 | 0.049234 |
| Cotl1   | 0.44 | 0.028827 |
| Ly86    | 0.45 | 0.028827 |
| Cd86    | 0.45 | 0.03883  |
| Cfp     | 0.46 | 0.002256 |
| Ikbke   | 0.46 | 0.012966 |
| Apobec3 | 0.46 | 0.034733 |
| Enpp1   | 0.46 | 0.03883  |
| Ogfr    | 0.46 | 0.045713 |
| Mgat4a  | 0.48 | 0.021159 |
| Lgmn    | 0.48 | 0.022582 |

|               |      |          |
|---------------|------|----------|
| Irf7          | 0.48 | 0.039345 |
| Hexb          | 0.48 | 0.042421 |
| Irf9          | 0.49 | 0.026945 |
| Fbln2         | 0.49 | 0.028827 |
| Il4ra         | 0.5  | 0.025289 |
| Rnf114        | 0.5  | 0.025799 |
| Gramd1b       | 0.51 | 0.025289 |
| Psmc1         | 0.51 | 0.044729 |
| C1qa          | 0.52 | 0.003924 |
| Tmem86a       | 0.52 | 0.00823  |
| Adar          | 0.52 | 0.025955 |
| Eif2ak2       | 0.55 | 0.012884 |
| Ly6a          | 0.55 | 0.016732 |
| Tspo          | 0.55 | 0.022529 |
| Zbp1          | 0.55 | 0.037352 |
| Abi3          | 0.56 | 0.013378 |
| Ms4a6c        | 0.56 | 0.014545 |
| Tgm2          | 0.56 | 0.021159 |
| Cdc25b        | 0.56 | 0.022382 |
| Ccl9          | 0.57 | 0.005882 |
| Pilra         | 0.57 | 0.006152 |
| Sgk1          | 0.57 | 0.009144 |
| 1600014C10Rik | 0.57 | 0.024288 |
| Pla1a         | 0.57 | 0.024793 |
| Gngt2         | 0.57 | 0.026746 |
| Tpx2          | 0.57 | 0.033494 |
| Ifi213        | 0.58 | 0.031859 |
| Aif1          | 0.59 | 0.005705 |
| Trpm2         | 0.59 | 0.014545 |
| Ms4a6d        | 0.59 | 0.01614  |
| Oasl2         | 0.59 | 0.021294 |

|         |      |          |
|---------|------|----------|
| Iqgap3  | 0.59 | 0.031859 |
| Ifit3b  | 0.59 | 0.045507 |
| Ms4a4a  | 0.6  | 0.000367 |
| Nlrc5   | 0.6  | 0.038072 |
| Acod1   | 0.6  | 0.03883  |
| Foxm1   | 0.6  | 0.04184  |
| Il21r   | 0.61 | 0.001452 |
| Dtx3l   | 0.61 | 0.004354 |
| Selplg  | 0.61 | 0.004354 |
| Ccr5    | 0.61 | 0.006196 |
| Cenpe   | 0.61 | 0.034365 |
| Ms4a6b  | 0.62 | 0.001244 |
| H2-K1   | 0.62 | 0.001588 |
| B2m     | 0.62 | 0.004875 |
| Nrep    | 0.62 | 0.028001 |
| Pnp     | 0.63 | 0.016589 |
| Ifi44   | 0.63 | 0.023526 |
| Slfn5   | 0.63 | 0.031859 |
| Prdx5   | 0.64 | 0.005053 |
| Psmb10  | 0.64 | 0.006032 |
| Sp110   | 0.64 | 0.024793 |
| Parp10  | 0.65 | 0.012577 |
| Ncapg   | 0.65 | 0.02991  |
| Bub1    | 0.65 | 0.03883  |
| Ccr1    | 0.65 | 0.04594  |
| Kntc1   | 0.66 | 0.026436 |
| Top2a   | 0.67 | 0.002415 |
| Sirpb1c | 0.67 | 0.004664 |
| Kif11   | 0.67 | 0.013342 |
| Tmem221 | 0.67 | 0.04184  |
| Pi15    | 0.68 | 0.00918  |

|           |      |          |
|-----------|------|----------|
| Psmb9     | 0.68 | 0.012878 |
| AW112010  | 0.68 | 0.039703 |
| Fanci     | 0.68 | 0.045811 |
| Ccna2     | 0.69 | 0.014545 |
| Epsti1    | 0.69 | 0.020581 |
| Nuf2      | 0.69 | 0.02507  |
| Igtp      | 0.69 | 0.025289 |
| H2-Q6     | 0.7  | 0.02991  |
| Irgm2     | 0.71 | 0.004429 |
| Trim34a   | 0.71 | 0.006152 |
| Ifit1     | 0.71 | 0.013342 |
| Plk1      | 0.72 | 0.011602 |
| Acp5      | 0.72 | 0.038614 |
| Uba7      | 0.73 | 0.000857 |
| Parp9     | 0.73 | 0.001591 |
| Pf4       | 0.73 | 0.014208 |
| Ifi2712a  | 0.73 | 0.017366 |
| Cep55     | 0.73 | 0.030892 |
| H2-Q4     | 0.74 | 0.00287  |
| Ly6e      | 0.74 | 0.012884 |
| Medag     | 0.75 | 0.006089 |
| Clu       | 0.75 | 0.006089 |
| Il6       | 0.76 | 0.006152 |
| Slfn8     | 0.77 | 0.002956 |
| Kif2c     | 0.77 | 0.024967 |
| Gbp2      | 0.78 | 0.003924 |
| Plxna4os1 | 0.78 | 0.024288 |
| BC147527  | 0.78 | 0.024288 |
| Mcm10     | 0.79 | 0.019066 |
| Kif18b    | 0.79 | 0.020581 |
| Ifi205    | 0.8  | 0.011648 |

|         |      |          |
|---------|------|----------|
| Gbp3    | 0.81 | 0.006196 |
| Mndal   | 0.83 | 0.000542 |
| Oas1b   | 0.83 | 0.008176 |
| Slfn9   | 0.84 | 0.000857 |
| Herc6   | 0.85 | 0.001588 |
| Cxcl3   | 0.86 | 0.006032 |
| Gm1966  | 0.88 | 0.006152 |
| Cxcl10  | 0.88 | 0.006362 |
| Rtp4    | 0.89 | 0.002549 |
| Chil1   | 0.9  | 0.001109 |
| Folr2   | 0.91 | 6.04E-05 |
| Ifi203  | 0.91 | 6.86E-05 |
| Bach2os | 0.93 | 0.001105 |
| Mx2     | 0.93 | 0.003561 |
| Ccl5    | 0.94 | 0.000944 |
| Gbp7    | 0.95 | 4.99E-06 |
| Ctla2a  | 0.95 | 6.17E-05 |
| Fcgr4   | 0.96 | 0.000424 |
| Saa3    | 0.96 | 0.000496 |
| Gbp5    | 0.98 | 0.000124 |
| Lcn2    | 0.98 | 0.000542 |
| Gm5431  | 0.99 | 5.36E-05 |
| Cd300lf | 1    | 0.000167 |
| Cdh5    | 1.01 | 0.000648 |
| Pecam1  | 1.02 | 0.000396 |
| Mmp9    | 1.04 | 6.5E-05  |
| Trem12  | 1.06 | 0.000185 |
| Trim30c | 1.09 | 2.74E-05 |
| Ly6i    | 1.11 | 2.56E-05 |
| Gm12250 | 1.17 | 3.84E-06 |
| Gm4951  | 1.2  | 2.72E-06 |



|         |      |          |
|---------|------|----------|
| Cd38    | 1.21 | 6.9E-06  |
| Oas2    | 1.22 | 3.08E-09 |
| Phf11a  | 1.22 | 3.7E-06  |
| Gm21188 | 1.24 | 1.41E-08 |
| Pydc3   | 1.25 | 1.74E-06 |
| Gm36161 | 1.37 | 7.46E-10 |
